## Linkage mechanics and power amplification of the mantis shrimp's strike

S. N. Patek, B. N. Nowroozi, J. E. Baio, R. L. Caldwell and A. P. Summers

10.1242/jeb.052274

There was an error published in *J. Exp. Biol.* **210**, 3677-3688.

In Eqn 1 on p. 3680, a '+' sign was used instead of the correct '-' sign. The equation is shown in its corrected form below.

$$L_{db} = \sqrt{L_2^2 + L_1^2 - 2L_1L_2\cos(\theta_{input})}, \quad (1)$$

The authors apologise for this error but assure readers that the correct equation was used in the calculations that form the results reported in the study.
